# Supplementary material for: Brønsted acidity of bio-protic ionic liquids: the acidic scale of [AA]X amino acid ionic liquids
Source: Royal Society of Chemistry journal article supplement (doi:10.1039/c5gc01913c), 2015-01-01
Supplement: c5gc01913c1.pdf [file c5gc01913c1.pdf]

# Brønsted Acidity of Bio-Protic Ionic Liquids: The Acidic Scale of [AA]X Amino Acid Ionic Liquids

Lei Zhang, Ling He\*, Cheng-Bin Hong, Song Qin and Guo-Hong Tao\*

*College of Chemistry, Sichuan University, Chengdu 610064, China*

Email: lhe@scu.edu.cn, taogh@scu.edu.cn

## **Contents:**

**S2-S4      The Hammett functions for [AA]X PILs in water.**

**S5-S22     The optimized geometry coordinates**

**Table S1.** The Hammett functions for AAILs and the contrastive compounds in water.

| Compound                             | $A_{\max}(\text{solvent})$ | $A_{\max}(\text{Compound})$ | $H_0$ |
|--------------------------------------|----------------------------|-----------------------------|-------|
| [Gly]NO <sub>3</sub>                 | 0.69705                    | 0.67298                     | 2.44  |
| [Ala]NO <sub>3</sub>                 | 0.69705                    | 0.67145                     | 2.41  |
| [Phe]NO <sub>3</sub>                 | 0.69705                    | /                           | /     |
| [Asn]NO <sub>3</sub>                 | 0.69705                    | 0.66757                     | 2.34  |
| [Ser]NO <sub>3</sub>                 | 0.69705                    | 0.66529                     | 2.31  |
| [Thr]NO <sub>3</sub>                 | 0.69705                    | 0.66560                     | 2.32  |
| [Val]NO <sub>3</sub>                 | 0.69705                    | 0.67248                     | 2.43  |
| [Ile]NO <sub>3</sub>                 | 0.69705                    | 0.67272                     | 2.42  |
| [Leu]NO <sub>3</sub>                 | 0.69705                    | 0.67227                     | 2.43  |
| [Pro]NO <sub>3</sub>                 | 0.69705                    | 0.66210                     | 2.26  |
| [His](NO <sub>3</sub> ) <sub>2</sub> | 0.69705                    | 0.64687                     | 2.10  |
| [Arg](NO <sub>3</sub> ) <sub>2</sub> | 0.69705                    | 0.65771                     | 2.21  |
| [Lys](NO <sub>3</sub> ) <sub>2</sub> | 0.69705                    | 0.66238                     | 2.27  |
| [Asp](NO <sub>3</sub> ) <sub>2</sub> | 0.69705                    | 0.65410                     | 2.17  |
| [Sar]NO <sub>3</sub>                 | 0.69705                    | 0.66803                     | 2.35  |
| [DMGly]NO <sub>3</sub>               | 0.69705                    | 0.66808                     | 2.35  |
| [Bet]NO <sub>3</sub>                 | 0.69705                    | 0.65395                     | 2.17  |
| EAN                                  | 0.69705                    | 0.69079                     | 3.04  |
| [Et <sub>3</sub> H]NO <sub>3</sub>   | 0.69705                    | 0.69221                     | 3.14  |
| Gly                                  | 0.69705                    | 0.69064                     | 3.02  |
| Pro                                  | 0.69705                    | 0.69328                     | 3.25  |

Concentrations of compound: 0.010 mol L<sup>-1</sup>; indicator: 5.0x10<sup>-5</sup> mol L<sup>-1</sup>. All tests are carried out at 25.0(±0.1) °C.

**Table S2.** The Hammett functions for [Pro]NO<sub>3</sub> in water.

| Concentration | A <sub>max</sub> (solvent) | A <sub>max</sub> (Compound) | H <sub>0</sub> |
|---------------|----------------------------|-----------------------------|----------------|
| 0             | 0.69705                    | 0                           | \              |
| 0.0010        | 0.69705                    | 0.69203                     | 3.13           |
| 0.0025        | 0.69705                    | 0.68829                     | 2.89           |
| 0.0050        | 0.69705                    | 0.68045                     | 2.6            |
| 0.00750       | 0.69705                    | 0.66985                     | 2.42           |
| 0.0100        | 0.69705                    | 0.66715                     | 2.34           |
| 0.0250        | 0.69705                    | 0.63567                     | 2.01           |
| 0.0500        | 0.69705                    | 0.59671                     | 1.76           |
| 0.0750        | 0.69705                    | 0.57542                     | 1.66           |
| 0.1000        | 0.69705                    | 0.54946                     | 1.56           |

Indicator:  $5.0 \times 10^{-5}$  mol L<sup>-1</sup>. All tests are carried out at 25.0(±0.1) °C.

**Table S3.** The Hammett functions for [Gly]NO<sub>3</sub> in water.

| Concentration | A <sub>max</sub> (solvent) | A <sub>max</sub> (Compound) | H <sub>0</sub> |
|---------------|----------------------------|-----------------------------|----------------|
| 0             | 0.69705                    | 0                           | \              |
| 0.0010        | 0.69705                    | 0.69293                     | 3.23           |
| 0.0025        | 0.69705                    | 0.68984                     | 2.97           |
| 0.0050        | 0.69705                    | 0.68418                     | 2.72           |
| 0.00750       | 0.69705                    | 0.67814                     | 2.54           |
| 0.0100        | 0.69705                    | 0.67298                     | 2.44           |
| 0.0250        | 0.69705                    | 0.65238                     | 2.15           |
| 0.0500        | 0.69705                    | 0.62431                     | 1.92           |
| 0.0750        | 0.69705                    | 0.61143                     | 1.84           |
| 0.1000        | 0.69705                    | 0.59898                     | 1.78           |

Indicator:  $5.0 \times 10^{-5}$  mol L<sup>-1</sup>. All tests are carried out at 25.0(±0.1) °C.

**The optimized geometry coordinates (Å) (M06/6-311++G(d,p) level)**

**Gly<sup>+</sup> (H<sub>2</sub>O)<sub>3</sub>**

|   |             |             |             |
|---|-------------|-------------|-------------|
| N | 0.92063900  | -0.00323200 | -0.33559800 |
| H | 0.66654500  | 0.86393900  | -0.84679800 |
| C | 0.17104100  | -0.04507600 | 0.93869400  |
| H | 0.41471000  | -0.95966000 | 1.47990100  |
| C | -1.31438700 | -0.00650300 | 0.64799900  |
| O | -1.77767600 | 0.06057400  | -0.45988400 |
| O | -2.01162500 | -0.05460900 | 1.76924700  |
| H | 0.64633600  | -0.82222100 | -0.90973000 |
| H | 1.93742300  | -0.02137700 | -0.14404100 |
| O | -0.34278800 | -2.25495300 | -1.32209200 |
| H | -0.15221700 | -3.12285000 | -1.68953700 |
| H | -1.23038100 | -2.01597700 | -1.61058200 |
| O | -0.25648000 | 2.34217400  | -1.20175200 |
| H | -0.04613300 | 3.21500800  | -1.54551200 |
| H | -1.15805100 | 2.13963100  | -1.47479100 |
| H | -2.95957800 | -0.02571000 | 1.56883400  |
| H | 0.44564600  | 0.81105700  | 1.55558000  |
| O | 3.58343000  | -0.04633300 | 0.58790700  |
| H | 4.15274400  | 0.71494600  | 0.73555000  |
| H | 4.13966700  | -0.81951400 | 0.72274800  |

**Gly<sup>+-</sup> (H<sub>2</sub>O)<sub>3</sub>**

|   |             |             |             |
|---|-------------|-------------|-------------|
| N | 0.88234100  | -0.46465100 | 0.06284900  |
| H | 0.51736400  | -1.03709400 | -0.72026200 |
| C | 0.39524500  | 0.94151600  | -0.07918500 |
| H | 0.81411900  | 1.53446700  | 0.73268200  |
| C | -1.16046200 | 1.04634900  | -0.04852400 |
| O | -1.77817500 | -0.06602400 | -0.04934200 |
| O | -1.58990400 | 2.18406300  | -0.03354300 |
| H | 0.50528700  | -0.87572600 | 0.93562500  |
| H | 1.90704900  | -0.48076800 | 0.07016400  |
| O | -0.83472500 | -1.43458600 | 2.01647500  |
| H | -1.19823000 | -1.32205400 | 2.89600500  |
| H | -1.45511800 | -1.00914400 | 1.38194200  |
| O | -0.66546200 | -1.47196800 | -1.99480900 |
| H | -1.06043700 | -2.17904100 | -2.50577000 |
| H | -1.36167900 | -1.06292600 | -1.43399600 |
| H | 0.75655000  | 1.33122200  | -1.03094500 |
| O | 3.68819800  | 0.22695800  | 0.05622300  |
| H | 3.91105600  | 1.10734700  | -0.25682800 |
| H | 4.51949900  | -0.18847000 | 0.29766100  |

**Ala<sup>+</sup> (H<sub>2</sub>O)<sub>3</sub>**

|   |             |             |             |
|---|-------------|-------------|-------------|
| N | 0.79789500  | 0.46043000  | 0.36379200  |
| H | 0.57143500  | 0.00629800  | 1.26970100  |
| C | 0.16458600  | -0.31267500 | -0.74011200 |
| H | 0.37155600  | 0.21270800  | -1.67536200 |
| C | 0.71164600  | -1.73605300 | -0.78398800 |
| C | -1.33725300 | -0.28745900 | -0.51402500 |
| H | 0.49967300  | -2.25265900 | 0.15438600  |
| H | 0.24322700  | -2.28054000 | -1.60263600 |
| H | 1.78911900  | -1.71002800 | -0.95010500 |
| O | -1.86650000 | 0.19738600  | 0.45305600  |
| O | -1.97673100 | -0.87383700 | -1.51261800 |
| H | 0.41441500  | 1.42343700  | 0.37509600  |
| H | 1.82174800  | 0.48434300  | 0.22367100  |
| O | -0.71073500 | 2.75656900  | -0.04679400 |
| H | -0.63043900 | 3.70212400  | -0.20081000 |
| H | -1.59702900 | 2.60079900  | 0.29710100  |
| O | -0.28672500 | -1.01510900 | 2.46321300  |
| H | -0.08439600 | -1.41198000 | 3.31513700  |
| H | -1.22092200 | -0.77791600 | 2.47339000  |
| H | -2.93096000 | -0.85650100 | -1.34412400 |
| O | 3.55119700  | 0.30444300  | -0.33403000 |
| H | 4.00169200  | 0.83514400  | -0.99815900 |
| H | 4.24770100  | -0.13674800 | 0.16230800  |

**Ala<sup>+·-</sup> (H<sub>2</sub>O)<sub>3</sub>**

|   |             |             |             |
|---|-------------|-------------|-------------|
| N | 0.75727100  | 0.60642900  | 0.04852400  |
| H | 0.47337600  | 0.65701200  | 1.04368700  |
| C | 0.26189000  | -0.68373600 | -0.54262500 |
| H | 0.57616600  | -0.69196900 | -1.58770500 |
| C | 0.87187300  | -1.85311000 | 0.21399700  |
| C | -1.29758200 | -0.74859700 | -0.50634000 |
| H | 0.58666200  | -1.80893800 | 1.26855900  |
| H | 0.48175500  | -2.77642600 | -0.21241700 |
| H | 1.96200700  | -1.85598500 | 0.13337600  |
| O | -1.87000000 | 0.17140300  | 0.16397700  |
| O | -1.78303900 | -1.68466700 | -1.11532600 |
| H | 0.31455000  | 1.41143300  | -0.42813300 |
| H | 1.77904600  | 0.66358200  | -0.02470400 |
| O | -1.09018500 | 2.46533700  | -0.91383100 |
| H | -1.53515900 | 2.82580000  | -1.68211100 |
| H | -1.65987300 | 1.74884500  | -0.55324500 |
| O | -0.59475300 | 0.30642400  | 2.47929800  |
| H | -0.94589100 | 0.71154900  | 3.27331100  |
| H | -1.32137800 | 0.25638000  | 1.81681900  |

|   |            |             |             |
|---|------------|-------------|-------------|
| O | 3.65302300 | 0.43478700  | -0.31750900 |
| H | 4.19087200 | 0.79307900  | -1.02786700 |
| H | 4.25950300 | -0.01297800 | 0.27769800  |

**Phe<sup>+</sup> (H<sub>2</sub>O)<sub>3</sub>**

|   |             |             |             |
|---|-------------|-------------|-------------|
| N | -2.24799000 | 0.59483400  | 0.07902100  |
| H | -2.42939800 | 0.19647800  | 1.02381000  |
| C | -0.83918800 | 0.31543100  | -0.32627200 |
| H | -0.66007500 | 0.78556900  | -1.29402000 |
| C | 0.11877800  | 0.87134900  | 0.74441100  |
| C | -0.68381600 | -1.18989600 | -0.46466600 |
| H | -0.17399700 | 0.45295300  | 1.71209400  |
| H | -0.02883000 | 1.95443100  | 0.78078600  |
| O | -1.27258900 | -1.98090600 | 0.22978000  |
| O | 0.18230600  | -1.50828000 | -1.40695000 |
| H | -2.89168300 | 0.14208600  | -0.58962600 |
| H | -2.39905500 | 1.61694800  | 0.08941000  |
| O | -3.22784200 | -1.16533600 | -1.85350400 |
| H | -3.68848600 | -1.15020800 | -2.69758400 |
| H | -3.28197700 | -2.07123100 | -1.53080000 |
| O | -2.38375500 | -0.77007200 | 2.49215900  |
| H | -2.79946500 | -0.84760500 | 3.35480500  |
| H | -2.10837600 | -1.65068500 | 2.21028800  |
| H | 0.33680600  | -2.46502900 | -1.39790000 |
| C | 1.55637800  | 0.53516500  | 0.43550600  |
| C | 2.18266900  | -0.53302200 | 1.07512800  |
| C | 2.25228100  | 1.25169100  | -0.53751900 |
| C | 3.48585600  | -0.88709200 | 0.73893200  |
| H | 1.65308800  | -1.08555000 | 1.84575900  |
| C | 3.55322700  | 0.89916700  | -0.87483700 |
| H | 1.77688600  | 2.09444900  | -1.03086400 |
| C | 4.17037900  | -0.17416600 | -0.23902000 |
| H | 3.96922000  | -1.71339800 | 1.24620800  |
| H | 4.08792200  | 1.46386000  | -1.62889800 |
| H | 5.18591500  | -0.44719100 | -0.49866600 |
| O | -2.18146600 | 3.42772900  | -0.10677000 |
| H | -2.21657600 | 4.06305300  | 0.61506600  |
| H | -2.30860000 | 3.94039900  | -0.91071700 |

**Phe<sup>+·-</sup> (H<sub>2</sub>O)<sub>3</sub>**

|   |             |             |             |
|---|-------------|-------------|-------------|
| N | -0.89047400 | 0.93947600  | -0.18276300 |
| H | -1.01126000 | 1.04418100  | 0.83915600  |
| C | -0.96088400 | -0.51263900 | -0.55665600 |
| H | -0.67875500 | -0.58165000 | -1.60850400 |

|   |             |             |             |
|---|-------------|-------------|-------------|
| C | -0.00441200 | -1.33548400 | 0.31468300  |
| C | -2.40769200 | -1.06474400 | -0.37349800 |
| H | -0.06776200 | -2.36260600 | -0.04953900 |
| H | -0.37219300 | -1.32161300 | 1.34457000  |
| H | -1.67690500 | 1.44990800  | -0.62375300 |
| H | 0.00160400  | 1.35776500  | -0.48557000 |
| O | -3.42158600 | 1.92738200  | -0.88121000 |
| H | -4.03648100 | 2.02322900  | -1.61038600 |
| H | -3.66232400 | 1.10458600  | -0.40443100 |
| O | -1.71107400 | 0.50103100  | 2.46265300  |
| H | -2.42346100 | 0.11269100  | 1.89922000  |
| H | -2.13012300 | 0.88113200  | 3.23630500  |
| C | 1.41481600  | -0.83109700 | 0.27150700  |
| C | 2.25652900  | -1.15514800 | -0.79566800 |
| C | 1.89752000  | 0.00872500  | 1.27742600  |
| C | 3.55243100  | -0.65151200 | -0.85694500 |
| H | 1.89300700  | -1.81281000 | -1.57897500 |
| C | 3.19175000  | 0.51899000  | 1.21825900  |
| H | 1.24918700  | 0.25535700  | 2.11359300  |
| C | 4.02269800  | 0.19199700  | 0.14990400  |
| H | 4.19811100  | -0.92254900 | -1.68421400 |
| H | 3.55372900  | 1.16594400  | 2.00867700  |
| H | 5.03441000  | 0.57777600  | 0.10733300  |
| O | -3.14591800 | -0.38779200 | 0.41316900  |
| O | -2.64728400 | -2.09525000 | -0.97662100 |
| O | 1.48923600  | 1.95251500  | -1.42645400 |
| H | 2.27103500  | 1.41429900  | -1.24729500 |
| H | 1.80797600  | 2.84042000  | -1.60322400 |

**Asn<sup>+</sup>(H<sub>2</sub>O)<sub>3</sub>**

|   |             |             |             |
|---|-------------|-------------|-------------|
| N | 0.99766900  | 0.97123300  | 0.86770700  |
| H | 1.86612700  | 1.36778700  | 0.43446800  |
| C | 1.05590600  | -0.51768800 | 0.92490000  |
| H | 1.83303700  | -0.78528500 | 1.64638800  |
| C | -0.27917700 | -1.11101400 | 1.35918000  |
| C | 1.54081100  | -1.01148900 | -0.43698600 |
| H | -0.16241000 | -2.19094500 | 1.47690800  |
| H | -0.58403000 | -0.70382700 | 2.32719700  |
| C | -1.34187600 | -0.83061200 | 0.30337000  |
| O | 2.11774300  | -0.31729800 | -1.22375600 |
| O | -0.99850300 | -0.38580300 | -0.78669700 |
| O | 1.31858800  | -2.31120500 | -0.57211700 |
| H | 0.91240700  | 1.35743100  | 1.80902100  |
| H | 1.65856300  | -2.60501300 | -1.43064400 |



|   |             |             |             |
|---|-------------|-------------|-------------|
| H | 0.15549000  | 1.30436600  | 0.35632400  |
| H | -3.34446700 | -0.79082400 | 0.00554400  |
| O | 3.40455100  | 1.84757400  | -0.10872800 |
| H | 3.56628100  | 1.38023800  | -0.93606400 |
| H | 4.00108000  | 2.59980000  | -0.07017200 |
| N | -2.61095200 | -1.08544400 | 0.63951100  |
| H | -2.86318000 | -1.40170600 | 1.56166900  |
| O | -1.52217800 | 2.09431500  | 0.58414600  |
| H | -2.20062200 | 1.83044800  | -0.06597600 |
| H | -1.78766200 | 2.95849000  | 0.90952400  |
| O | -3.23401900 | 0.99525800  | -1.35007700 |
| H | -2.50777700 | 0.53366300  | -1.79331700 |
| H | -3.79329300 | 1.38694600  | -2.02633200 |

**Asn<sup>+</sup>(H<sub>2</sub>O)<sub>3</sub>**

|   |             |             |             |
|---|-------------|-------------|-------------|
| N | 0.84683300  | -1.21016500 | -0.57052100 |
| C | 0.06805800  | 0.03062300  | -0.25463000 |
| H | -0.38280100 | 0.37229700  | -1.19076400 |
| C | -1.03053200 | -0.34139200 | 0.74397300  |
| C | 0.97017900  | 1.18834700  | 0.26207400  |
| H | -0.60222700 | -0.95917400 | 1.53832100  |
| H | -1.44111700 | 0.56310700  | 1.18489600  |
| C | -2.07579400 | -1.14015900 | -0.00578100 |
| O | 2.19349600  | 0.93627100  | 0.40155100  |
| O | -1.80400200 | -2.24833600 | -0.45775700 |
| O | 0.36098700  | 2.24064400  | 0.46683700  |
| H | 1.53478600  | -1.03088300 | -1.32086700 |
| H | 0.17813800  | -1.95287700 | -0.81904000 |
| N | -3.25907300 | -0.52450500 | -0.18360500 |
| O | 3.00135500  | -0.14273900 | -1.93255400 |
| H | 3.00500000  | 0.43429500  | -1.14375600 |
| H | 3.39619900  | 0.34317100  | -2.65788200 |
| H | 1.37042600  | -1.50140400 | 0.27581800  |
| O | 2.09239300  | -1.26977800 | 1.91682400  |
| H | 2.69655300  | -1.64472800 | 2.55935800  |
| H | 2.41973900  | -0.38746400 | 1.65803800  |
| O | -2.30158300 | 2.28506900  | -0.16263400 |
| H | -2.63465200 | 3.15952800  | -0.37093500 |
| H | -1.35397300 | 2.40149700  | 0.07151800  |
| H | -3.30538100 | 0.48057500  | -0.04293300 |
| H | -3.92763600 | -0.96880800 | -0.79483300 |

**Ser<sup>+</sup>(H<sub>2</sub>O)<sub>3</sub>**

|   |             |             |             |
|---|-------------|-------------|-------------|
| N | 0.40614700  | 0.60491700  | 0.72734900  |
| H | -0.16176100 | 1.47271200  | 0.69092600  |
| C | 0.19493000  | -0.14615300 | -0.53402400 |
| H | 0.59615800  | 0.46323400  | -1.34802800 |
| C | 0.91090900  | -1.49500300 | -0.49243000 |
| C | -1.29759900 | -0.34097200 | -0.73816200 |
| H | 0.46214600  | -2.11942100 | 0.28793000  |
| H | 0.78611200  | -1.97761000 | -1.46460200 |
| O | 2.27085800  | -1.22384800 | -0.20725500 |
| O | -2.13475200 | -0.01328600 | 0.05975300  |
| H | 2.74277200  | -2.05099700 | -0.07292900 |
| O | -1.53984000 | -0.93496600 | -1.89648800 |
| H | 1.40480100  | 0.87270100  | 0.78585900  |
| H | -2.49470600 | -1.06120600 | -2.00752100 |
| H | 0.10137600  | 0.03457400  | 1.53495200  |
| O | -0.92948700 | -1.24860400 | 2.33575700  |
| H | -0.90261100 | -1.68672400 | 3.19135400  |
| H | -1.85750100 | -1.08226500 | 2.13435200  |
| O | -1.28500400 | 2.69579700  | 0.02641500  |
| H | -2.21591800 | 2.46727200  | 0.11655300  |
| H | -1.23823500 | 3.65093700  | -0.07388600 |
| O | 2.89354300  | 1.45809300  | -0.05574900 |
| H | 3.54971200  | 2.15898000  | -0.03207600 |
| H | 3.33264900  | 0.65067600  | -0.34611000 |

**Ser<sup>+-</sup> (H<sub>2</sub>O)<sub>3</sub>**

|   |             |             |             |
|---|-------------|-------------|-------------|
| N | 0.27784000  | 0.87013000  | 0.45283600  |
| H | -0.40036900 | 1.58937900  | 0.13803800  |
| C | 0.30070200  | -0.25613800 | -0.53415600 |
| H | 0.74990000  | 0.13320900  | -1.44944300 |
| C | 1.11979300  | -1.41086200 | 0.00186100  |
| C | -1.14379500 | -0.77842200 | -0.84967900 |
| H | 0.66908800  | -1.77628400 | 0.93132400  |
| H | 1.10033700  | -2.20010100 | -0.75118200 |
| O | 2.45816400  | -0.96334000 | 0.25076900  |
| O | -2.06754800 | -0.28831900 | -0.13061400 |
| H | 2.94701200  | -1.66433100 | 0.68839000  |
| O | -1.19361100 | -1.61439800 | -1.73440700 |
| H | -0.05198600 | 0.52594900  | 1.36978700  |
| O | -1.15714000 | -0.58605100 | 2.35549200  |
| H | -1.68561500 | -0.63034400 | 3.15354600  |
| H | -1.76647200 | -0.58543700 | 1.58460900  |
| O | -1.96827400 | 2.35885400  | -0.32117800 |
| H | -2.33590500 | 1.44991600  | -0.33419600 |

|   |             |            |             |
|---|-------------|------------|-------------|
| H | -2.34301100 | 2.83280100 | -1.06518500 |
| H | 1.20880000  | 1.29991300 | 0.52412400  |
| O | 2.86678600  | 1.67237800 | -0.29549300 |
| H | 3.15532900  | 0.74926000 | -0.25211300 |
| H | 3.64079700  | 2.22469200 | -0.41226400 |

**Thr<sup>+</sup> (H<sub>2</sub>O)<sub>3</sub>**

|   |             |             |             |
|---|-------------|-------------|-------------|
| N | 0.17584800  | 0.38059000  | 1.13339900  |
| H | 1.09881100  | -0.02260100 | 1.38858300  |
| C | -0.60502700 | -0.67705500 | 0.43651100  |
| H | -0.58890500 | -1.57424600 | 1.05748600  |
| C | -2.05129000 | -0.25426100 | 0.16641400  |
| C | 0.10443500  | -0.97916600 | -0.87661900 |
| H | -2.52564600 | -1.11784400 | -0.31078500 |
| C | -2.81468900 | 0.12858100  | 1.42525800  |
| O | -1.96608900 | 0.82790500  | -0.75432700 |
| O | 0.98659200  | -0.30990000 | -1.33206100 |
| H | -2.42833700 | 1.05358600  | 1.86158500  |
| H | -3.86433600 | 0.30492900  | 1.18464000  |
| H | -2.77785200 | -0.67213900 | 2.16747500  |
| H | -2.84487200 | 1.03976500  | -1.08447900 |
| H | -0.29874200 | 0.68203100  | 1.98459400  |
| O | -0.41813300 | -2.05645700 | -1.44466300 |
| H | 0.33491500  | 1.21768700  | 0.52264100  |
| H | 0.03038700  | -2.22676800 | -2.28670300 |
| O | 0.39746100  | 2.49547300  | -0.64182900 |
| H | 0.44631500  | 3.45366200  | -0.58222700 |
| H | -0.35441400 | 2.28064800  | -1.20792100 |
| O | 2.92326900  | 0.97070200  | 0.22242900  |
| H | 2.47291100  | 1.06823500  | -0.62720500 |
| O | 2.21101500  | -1.43568300 | 1.23688700  |
| H | 2.65719800  | -2.10696900 | 1.75891500  |
| H | 2.89111300  | -0.89114700 | 0.80905300  |
| H | 3.64702500  | 1.60212800  | 0.22969000  |

**Thr<sup>+·</sup> (H<sub>2</sub>O)<sub>3</sub>**

|   |             |             |             |
|---|-------------|-------------|-------------|
| N | -0.09590100 | 0.00065600  | -1.10648000 |
| H | -0.85526400 | -0.36531700 | -1.70675300 |
| C | -0.02538100 | -0.85735800 | 0.13418800  |
| H | -0.34876900 | -1.85810900 | -0.15982800 |
| C | 1.38593900  | -0.89848600 | 0.70985400  |
| C | -1.06307900 | -0.24295100 | 1.13117100  |
| H | 1.30626800  | -1.46830700 | 1.64171500  |

|   |             |             |             |
|---|-------------|-------------|-------------|
| C | 2.41111300  | -1.56348200 | -0.19216700 |
| O | 1.82596300  | 0.42100000  | 1.01139600  |
| O | -2.24325400 | -0.20660900 | 0.69664000  |
| H | 2.54715900  | -1.02483100 | -1.13277500 |
| H | 3.37664300  | -1.58488200 | 0.31475200  |
| H | 2.11161500  | -2.59026900 | -0.41140000 |
| H | 1.19616400  | 0.73954800  | 1.68239300  |
| H | 0.79282100  | 0.05577600  | -1.61381400 |
| O | -0.61373700 | 0.21926800  | 2.18250500  |
| H | -0.35254700 | 0.97565200  | -0.85628500 |
| O | -2.40460000 | -1.33081100 | -1.69295300 |
| H | -2.59529600 | -0.99843100 | -0.78176400 |
| H | -3.23590300 | -1.40662100 | -2.16282600 |
| O | -1.48991800 | 2.29370200  | -0.21768600 |
| H | -2.09429000 | 1.69417500  | 0.25370800  |
| H | -1.25381100 | 2.97854800  | 0.41176700  |
| O | 2.24201300  | 1.45925500  | -1.49235900 |
| H | 2.33834800  | 1.35627300  | -0.52986800 |
| H | 2.95487500  | 2.01941400  | -1.80228500 |

### Val<sup>+</sup> (H<sub>2</sub>O)<sub>3</sub>

|   |             |             |             |
|---|-------------|-------------|-------------|
| N | -0.09418300 | 1.19804400  | -0.10289100 |
| H | -0.34702600 | 1.22418300  | 0.90456200  |
| C | 0.24248600  | -0.18237800 | -0.55616400 |
| H | 0.35756100  | -0.14895200 | -1.64197700 |
| C | 1.55010500  | -0.67564400 | 0.10178200  |
| C | -0.95759900 | -1.05379800 | -0.22816400 |
| O | -1.85786800 | -0.70891500 | 0.49410000  |
| O | -0.88182400 | -2.23706700 | -0.81735500 |
| H | -0.92763300 | 1.51928000  | -0.62318700 |
| H | 0.70109800  | 1.83290100  | -0.28396600 |
| O | -2.38711600 | 1.15862400  | -1.68998700 |
| H | -2.75628900 | 1.59549900  | -2.46305900 |
| H | -3.13033900 | 0.77377200  | -1.21361300 |
| O | -1.20428100 | 1.21225400  | 2.46384800  |
| H | -1.32488700 | 1.67842800  | 3.29503600  |
| H | -1.87357000 | 0.52095800  | 2.41265600  |
| H | -1.65090200 | -2.77049400 | -0.56415300 |
| H | 2.23928700  | 0.17354000  | 0.02756600  |
| C | 2.16219200  | -1.84137800 | -0.67550800 |
| C | 1.34854900  | -1.02936400 | 1.57621100  |
| H | 2.30882500  | -1.59102800 | -1.72845200 |
| H | 3.13641400  | -2.08544800 | -0.24942500 |
| H | 1.53670300  | -2.73285100 | -0.61944800 |

|   |            |             |             |
|---|------------|-------------|-------------|
| H | 0.89662200 | -0.21872600 | 2.15292500  |
| H | 0.71145300 | -1.91379600 | 1.67819400  |
| H | 2.31021300 | -1.26778900 | 2.03233300  |
| O | 2.22092900 | 2.75513000  | -0.70706300 |
| H | 2.51075700 | 3.04634700  | -1.57693700 |
| H | 2.76788000 | 3.23303400  | -0.07610300 |

**Val<sup>+-</sup>(H<sub>2</sub>O)<sub>3</sub>**

|   |             |             |             |
|---|-------------|-------------|-------------|
| N | -0.31670300 | 1.18403100  | 0.30735400  |
| H | -0.73255600 | 0.81740300  | 1.18258800  |
| C | 0.40959300  | 0.11119500  | -0.45436200 |
| H | 0.78856300  | 0.59254100  | -1.35856300 |
| C | 1.58383300  | -0.41896500 | 0.38780600  |
| C | -0.57894300 | -1.01912100 | -0.87690000 |
| H | 2.02923000  | 0.44826900  | 0.89602000  |
| O | -1.72649800 | -0.97455900 | -0.33103800 |
| O | -0.13202200 | -1.82538000 | -1.67629600 |
| H | -1.11737100 | 1.52801300  | -0.25163500 |
| H | 0.33203800  | 1.95350700  | 0.49777700  |
| O | -2.75694200 | 1.36507400  | -1.05250000 |
| H | -3.20940800 | 1.50118700  | -1.88634400 |
| H | -2.65383600 | 0.39635400  | -0.92686200 |
| O | -1.90528200 | -0.18142200 | 2.21438300  |
| H | -2.78045000 | 0.01561900  | 2.55272500  |
| H | -2.02636000 | -0.67772200 | 1.37450700  |
| C | 2.64858700  | -1.04501600 | -0.51360100 |
| C | 1.12124100  | -1.41075300 | 1.45797200  |
| H | 3.02549700  | -0.32597000 | -1.24778700 |
| H | 3.49095100  | -1.39526100 | 0.08730600  |
| H | 2.22481300  | -1.88797700 | -1.06117400 |
| H | 0.70218900  | -2.30265700 | 0.98435700  |
| H | 1.97116200  | -1.71876900 | 2.07090400  |
| H | 0.36130900  | -0.99279900 | 2.12277300  |
| O | 1.98608900  | 2.89345800  | -0.00989600 |
| H | 2.18610500  | 3.82325700  | -0.14331300 |
| H | 2.79642300  | 2.41538400  | -0.20747900 |

**Ile<sup>+</sup>(H<sub>2</sub>O)<sub>3</sub>**

|   |             |             |             |
|---|-------------|-------------|-------------|
| N | 0.38615600  | -1.86477200 | -0.63870500 |
| H | 0.62306200  | -2.08403500 | 0.35281600  |
| C | -0.29427600 | -0.53824100 | -0.77713000 |
| H | -0.37371500 | -0.32859800 | -1.84645300 |
| C | -1.69524500 | -0.56493700 | -0.13046600 |

|   |             |             |             |
|---|-------------|-------------|-------------|
| C | 0.64244500  | 0.49026800  | -0.15448500 |
| H | -2.14048900 | -1.52597100 | -0.42574200 |
| O | 1.60160000  | 0.17215000  | 0.51683200  |
| O | 0.27973400  | 1.71332900  | -0.42538900 |
| H | 1.28647300  | -1.83149800 | -1.15585200 |
| H | -0.20074000 | -2.60943200 | -1.01457300 |
| O | 2.66071500  | -0.98161400 | -1.90301600 |
| H | 3.24277800  | -1.14322400 | -2.65095300 |
| H | 3.15469400  | -0.45380500 | -1.26621800 |
| O | 1.40662200  | -2.26975100 | 1.89890200  |
| H | 1.61639400  | -2.88237400 | 2.60839200  |
| H | 1.88495500  | -1.44791800 | 2.05556500  |
| H | 0.90049400  | 2.36557200  | 0.00088400  |
| C | -1.61113300 | -0.51161900 | 1.39663200  |
| C | -2.59083500 | 0.53706000  | -0.71419100 |
| H | -1.31042100 | 0.48795700  | 1.72656800  |
| H | -2.58389800 | -0.72643200 | 1.83773200  |
| H | -0.89913100 | -1.23310300 | 1.80533300  |
| H | -2.58804900 | 0.44908700  | -1.80567400 |
| H | -2.16595700 | 1.51507600  | -0.47666700 |
| C | -4.02858200 | 0.45529300  | -0.20531000 |
| H | -4.44806300 | -0.54280400 | -0.35843200 |
| H | -4.09695900 | 0.69341700  | 0.85728400  |
| H | -4.65935400 | 1.16597400  | -0.73989900 |
| O | 1.93583800  | 3.41969400  | 0.70981200  |
| H | 2.53584200  | 3.16790500  | 1.41681600  |
| H | 1.90868200  | 4.38019200  | 0.68257800  |

**He<sup>+-</sup>(H<sub>2</sub>O)<sub>3</sub>**

|   |             |             |             |
|---|-------------|-------------|-------------|
| N | 0.89939000  | -1.78317500 | 0.06003200  |
| H | 1.19355100  | -1.39500200 | 0.98017700  |
| C | -0.11793100 | -0.90352200 | -0.61906300 |
| H | -0.29726800 | -1.34309000 | -1.60248500 |
| C | -1.42197700 | -0.87552700 | 0.19610400  |
| C | 0.48366100  | 0.51437700  | -0.81497600 |
| H | -1.63653300 | -1.91580700 | 0.48979500  |
| O | 1.52922100  | 0.77363200  | -0.13527400 |
| O | -0.12501500 | 1.24373200  | -1.58348800 |
| H | 1.76862200  | -1.81548100 | -0.50571300 |
| H | 0.53425900  | -2.72465600 | 0.19669700  |
| O | 3.23769500  | -1.02077000 | -1.18813800 |
| H | 3.74137100  | -0.91379600 | -1.99686900 |
| H | 2.90290700  | -0.14034000 | -0.92642700 |
| O | 1.97341800  | -0.39706200 | 2.24714100  |

|   |             |             |             |
|---|-------------|-------------|-------------|
| H | 2.84335400  | -0.38580300 | 2.65052500  |
| H | 1.95472800  | 0.30589100  | 1.56778400  |
| C | -1.27717800 | -0.02596800 | 1.46225700  |
| C | -2.58883300 | -0.41001200 | -0.68593800 |
| H | -1.13162500 | 1.02860600  | 1.20378300  |
| H | -2.17434100 | -0.10583000 | 2.07712900  |
| H | -0.43273500 | -0.33468200 | 2.08330500  |
| H | -2.61316300 | -1.03040900 | -1.58869500 |
| H | -2.39279700 | 0.61146800  | -1.01904500 |
| C | -3.94048900 | -0.49307600 | 0.02008800  |
| H | -4.10651600 | -1.48745400 | 0.44624100  |
| H | -4.02001600 | 0.23721300  | 0.82690700  |
| H | -4.75072300 | -0.29193200 | -0.68269900 |
| O | 0.22574200  | 3.33736600  | 0.41609100  |
| H | 0.95571000  | 2.70614600  | 0.41090600  |
| H | -0.18651100 | 3.14438400  | -0.43305000 |

### Leu<sup>+</sup>(H<sub>2</sub>O)<sub>3</sub>

|   |             |             |             |
|---|-------------|-------------|-------------|
| N | -1.19944300 | 1.06345700  | -0.03187900 |
| H | -1.39739800 | 1.02671300  | 0.98887700  |
| C | -0.16591000 | 0.04532000  | -0.38034300 |
| H | 0.02355900  | 0.11401900  | -1.45250200 |
| C | 1.10809800  | 0.32787300  | 0.42856300  |
| C | -0.75737900 | -1.31728200 | -0.06998400 |
| H | 1.39315800  | 1.36349500  | 0.20653600  |
| O | -1.66282800 | -1.49341400 | 0.70556700  |
| O | -0.14686100 | -2.28175900 | -0.74072000 |
| H | -2.07430600 | 0.85043500  | -0.53876200 |
| H | -0.85538600 | 2.00348200  | -0.28929000 |
| O | -3.15852900 | -0.30910900 | -1.47351400 |
| O | -1.58795100 | 0.52145000  | 2.66947400  |
| H | -1.79589700 | 0.89063000  | 3.53179500  |
| H | -1.90491300 | -0.38879800 | 2.65565800  |
| H | -0.52124300 | -3.13856100 | -0.48480200 |
| C | 2.30658300  | -0.58104000 | 0.12592100  |
| H | 2.05764300  | -1.60434100 | 0.42471700  |
| C | 3.49503500  | -0.11481600 | 0.96809000  |
| H | 3.80692400  | 0.89082600  | 0.67049900  |
| H | 3.25094300  | -0.09491700 | 2.03276100  |
| H | 4.34734900  | -0.78187300 | 0.83031900  |
| H | 0.85279100  | 0.27764700  | 1.49300000  |
| C | 2.66229700  | -0.58051600 | -1.36117500 |
| H | 2.81137500  | 0.44309300  | -1.72166700 |
| H | 3.59289200  | -1.12539300 | -1.52828500 |

|   |             |             |             |
|---|-------------|-------------|-------------|
| H | 1.89436200  | -1.05870600 | -1.97292800 |
| H | -3.54256100 | -1.01012200 | -0.93603500 |
| H | -3.73483400 | -0.20028000 | -2.23553600 |
| O | 0.03978400  | 3.48661000  | -0.86753400 |
| H | 0.35051600  | 4.19833700  | -0.29953300 |
| H | 0.07986700  | 3.83265300  | -1.76428000 |

**Leu<sup>+-</sup> (H<sub>2</sub>O)<sub>3</sub>**

|   |             |             |             |
|---|-------------|-------------|-------------|
| N | -1.12931000 | 1.11684300  | 0.47614600  |
| H | -1.38720000 | 0.63293600  | 1.35683200  |
| C | -0.12734900 | 0.29441100  | -0.28595300 |
| H | 0.18507300  | 0.90596400  | -1.13265300 |
| C | 1.04498400  | -0.01887800 | 0.64518300  |
| C | -0.79071500 | -0.99810000 | -0.84225900 |
| H | 1.41954000  | 0.92248300  | 1.07374200  |
| O | -1.81425800 | -1.40319400 | -0.20404600 |
| O | -0.24739800 | -1.48019600 | -1.82353200 |
| H | -2.00138400 | 1.21685600  | -0.07323200 |
| H | -0.71982200 | 2.03600900  | 0.66698300  |
| O | -3.52764700 | 0.55062000  | -0.84553300 |
| H | -3.97814900 | 0.56396700  | -1.69158100 |
| H | -3.16466300 | -0.35252100 | -0.72623400 |
| O | -1.75047900 | -0.82981700 | 2.37518000  |
| H | -2.44823100 | -1.12601200 | 2.96152000  |
| H | -1.87220300 | -1.28520700 | 1.50789200  |
| C | 2.21332200  | -0.75100800 | -0.02339000 |
| H | 1.84517900  | -1.71059800 | -0.39642200 |
| C | 3.30738500  | -1.00348300 | 1.01378400  |
| H | 3.71132600  | -0.05636000 | 1.38814700  |
| H | 2.92330800  | -1.56600700 | 1.86820700  |
| H | 4.13321800  | -1.57030100 | 0.57829100  |
| H | 0.66626200  | -0.61663700 | 1.48211600  |
| C | 2.76586300  | 0.03198000  | -1.21410200 |
| H | 3.04778600  | 1.04982000  | -0.91044700 |
| H | 3.66692200  | -0.44581600 | -1.60530400 |
| H | 2.04119300  | 0.08306500  | -2.02852400 |
| O | 0.71853400  | 3.28750500  | 0.10050100  |
| H | 0.82371100  | 4.24191400  | 0.09484000  |
| H | 1.50234100  | 2.92966000  | -0.32733100 |

**Pro<sup>+</sup> (H<sub>2</sub>O)<sub>3</sub>**

|   |             |            |             |
|---|-------------|------------|-------------|
| N | 0.68989900  | 0.85741500 | -0.10850100 |
| C | -0.24528800 | 1.44286400 | -1.14732400 |



|   |             |             |             |
|---|-------------|-------------|-------------|
| C | 0.00172400  | -0.31629200 | 0.53106600  |
| H | 0.13256100  | 1.11817900  | -2.11668200 |
| H | -0.20564400 | 2.52867900  | -1.08614000 |
| C | -1.59884400 | 0.82241300  | -0.82405400 |
| C | -1.22707700 | -0.58127700 | -0.35065200 |
| H | -0.29984400 | -0.02114200 | 1.53791700  |
| C | 0.95237000  | -1.49066700 | 0.61321800  |
| H | -2.26671900 | 0.81158100  | -1.68282900 |
| H | -2.10341300 | 1.36585000  | -0.02166100 |
| H | -0.94564300 | -1.21160800 | -1.19990100 |
| H | -2.02806800 | -1.06627600 | 0.20210500  |
| O | 2.03176800  | -1.52331100 | 0.08694800  |
| O | 0.41393600  | -2.47864300 | 1.31177300  |
| H | 1.56649700  | 0.56706700  | -0.58122400 |
| H | 0.91573700  | 1.55247200  | 0.61928000  |
| H | 1.02269300  | -3.23270800 | 1.32872700  |
| O | 2.62334400  | 0.20321400  | -2.01550500 |
| H | 3.18516300  | 0.59995200  | -2.68638700 |
| H | 3.02319700  | -0.63805200 | -1.76937100 |
| O | 0.96221800  | 2.55761800  | 2.12732000  |
| H | 0.35934900  | 3.24996900  | 2.41430700  |
| H | 1.75092500  | 2.65679800  | 2.66954600  |
| O | -4.33271100 | -0.34061600 | -0.19158100 |
| H | -4.99379300 | 0.08848100  | 0.35800400  |
| H | -4.82803700 | -0.97949300 | -0.71135100 |

**Pro<sup>+-</sup>(H<sub>2</sub>O)<sub>3</sub>**

|   |             |             |             |
|---|-------------|-------------|-------------|
| N | -0.72334400 | 0.75199900  | -0.55541800 |
| C | -2.19223700 | 1.06736600  | -0.62451900 |
| C | -0.39588000 | 0.25635400  | 0.82737900  |
| H | -2.60789700 | 0.45858900  | -1.42536600 |
| H | -2.32572400 | 2.12253400  | -0.85522700 |
| C | -2.74728300 | 0.66165800  | 0.74949600  |
| C | -1.72112600 | -0.34630800 | 1.27930600  |
| H | -0.12139200 | 1.12224400  | 1.43092000  |
| C | 0.80405700  | -0.71830400 | 0.75978400  |
| H | -3.75024900 | 0.24509000  | 0.66287200  |
| H | -2.79410800 | 1.53067600  | 1.40999900  |
| H | -1.86127900 | -1.32026000 | 0.80234700  |
| H | -1.75149900 | -0.47073200 | 2.36041300  |
| O | 0.92124000  | -1.33776700 | -0.33879000 |
| O | 1.52541300  | -0.75933600 | 1.75067400  |
| H | -0.50839600 | -0.02579300 | -1.19580300 |
| H | -0.07085300 | 1.51547800  | -0.79435400 |

|   |             |             |             |
|---|-------------|-------------|-------------|
| O | 3.38761200  | -0.02448900 | -0.32910900 |
| H | 2.81079700  | -0.73571400 | -0.65367200 |
| O | -1.31937100 | -1.78897600 | -1.71930200 |
| H | -0.46027400 | -1.95437500 | -1.27641400 |
| H | -1.39065100 | -2.41493100 | -2.44181600 |
| H | 3.35586500  | -0.18368500 | 0.62426000  |
| O | 1.67738200  | 2.05017300  | -0.75963400 |
| H | 2.35315300  | 1.34455600  | -0.61860600 |
| H | 2.16250900  | 2.86090000  | -0.92102300 |

**Sar<sup>+</sup> (H<sub>2</sub>O)<sub>3</sub>**

|   |             |             |             |
|---|-------------|-------------|-------------|
| N | 0.35187900  | 1.01744200  | -0.39596600 |
| H | 0.93815200  | 0.55552400  | 0.31782300  |
| C | -0.37671300 | -0.01302700 | -1.16949400 |
| H | -1.15992600 | 0.46850500  | -1.75749300 |
| C | -0.99682200 | -1.00594300 | -0.21301100 |
| O | -0.93336900 | -0.91009800 | 0.98656900  |
| O | -1.61385600 | -1.97030500 | -0.86844200 |
| H | -0.35937000 | 1.56328500  | 0.12083200  |
| O | -2.05800200 | 1.77761600  | 0.74053500  |
| H | -2.65140400 | 2.53018400  | 0.82135600  |
| H | -2.30391300 | 1.15548100  | 1.43339000  |
| O | 2.21850600  | -1.09141400 | -0.46553700 |
| H | 2.83167100  | -1.68585400 | -0.90570700 |
| H | 2.42129900  | -1.13097500 | 0.47813800  |
| H | -2.00402900 | -2.59846900 | -0.24154800 |
| H | 0.32212400  | -0.53091900 | -1.82376800 |
| C | 1.20439900  | 1.88937400  | -1.24769300 |
| H | 0.58432700  | 2.35667400  | -2.01061800 |
| H | 1.66137700  | 2.65031600  | -0.61889900 |
| H | 1.97199700  | 1.26470000  | -1.69954500 |
| O | 1.57138600  | -0.12558000 | 2.02054800  |
| H | 0.77022400  | -0.56348400 | 2.33346200  |
| H | 2.05181500  | 0.17876800  | 2.79613800  |

**Sar<sup>+·</sup> (H<sub>2</sub>O)<sub>3</sub>**

|   |             |             |             |
|---|-------------|-------------|-------------|
| N | -1.35310300 | 0.58539300  | -0.01989800 |
| H | -1.59270700 | -0.21238800 | -0.63595800 |
| C | -0.71851800 | 0.03405800  | 1.21357300  |
| H | -0.51589600 | 0.85769100  | 1.89629500  |
| C | 0.60594200  | -0.67827000 | 0.84034700  |
| O | 0.59437100  | -1.25300400 | -0.28851700 |
| O | 1.52780100  | -0.57768200 | 1.64135800  |

|   |             |             |             |
|---|-------------|-------------|-------------|
| H | -0.62004500 | 1.14657600  | -0.50400300 |
| O | 0.87974800  | 1.90434900  | -0.90475200 |
| H | 1.68075000  | 1.32147900  | -0.89270400 |
| H | 1.17206900  | 2.77533200  | -1.17751900 |
| O | -1.81460300 | -1.92045000 | -1.09222000 |
| H | -1.98808600 | -2.47603600 | -1.85319300 |
| H | -0.84670000 | -1.95223500 | -0.90236400 |
| H | -1.41949000 | -0.66947300 | 1.66741200  |
| C | -2.55917700 | 1.39767000  | 0.23916100  |
| H | -2.29052400 | 2.24432500  | 0.86901600  |
| H | -2.96217900 | 1.75452100  | -0.70719600 |
| H | -3.29937700 | 0.77976100  | 0.74549900  |
| O | 2.91001100  | 0.14312200  | -0.77757400 |
| H | 3.09096400  | 0.05573800  | 0.16813200  |
| H | 2.31483400  | -0.61446700 | -0.91897300 |

### DMGly<sup>+</sup> (H<sub>2</sub>O)<sub>3</sub>

|   |             |             |             |
|---|-------------|-------------|-------------|
| N | -1.52645100 | -0.57552300 | -0.13938300 |
| C | -0.34099300 | -1.16586300 | 0.53719200  |
| H | -0.42522800 | -0.98860900 | 1.60769600  |
| C | 0.93923900  | -0.50853300 | 0.04876100  |
| O | 0.95095400  | 0.38194600  | -0.77012600 |
| O | 1.97860600  | -1.03471800 | 0.63095900  |
| H | -1.37351600 | 0.44547700  | -0.19697700 |
| O | -1.11900200 | 2.18808400  | -0.93497800 |
| H | -1.51263200 | 2.88788600  | -1.46343200 |
| H | -0.23525300 | 2.01094400  | -1.28426400 |
| H | 2.81859600  | -0.59243200 | 0.32584400  |
| H | -0.31834700 | -2.24058200 | 0.34632600  |
| C | -2.76728900 | -0.79737200 | 0.65694800  |
| C | -1.67553300 | -1.06988900 | -1.53888800 |
| H | -2.64089500 | -0.30590600 | 1.61879000  |
| H | -3.60595000 | -0.36008400 | 0.11808400  |
| H | -2.91804400 | -1.86989900 | 0.77782400  |
| H | -1.90515800 | -2.13466100 | -1.50775400 |
| H | -2.48958500 | -0.52381500 | -2.01166700 |
| H | -0.74631100 | -0.88813200 | -2.07373100 |
| O | -0.82370700 | 1.44561300  | 1.70836600  |
| H | -0.62036000 | 1.81249400  | 2.57254600  |
| H | -0.85628600 | 2.18872600  | 1.09186800  |
| O | 4.17551300  | 0.15452300  | -0.17736900 |
| H | 4.20023700  | 0.76861100  | -0.91587700 |
| H | 5.08244100  | -0.01499900 | 0.09150200  |

**DMGly<sup>+-</sup>(H<sub>2</sub>O)<sub>3</sub>**

|   |             |             |             |
|---|-------------|-------------|-------------|
| N | 1.15082800  | 0.86870000  | -0.10948000 |
| H | 1.99948400  | 0.26928100  | -0.07849300 |
| C | 0.05573200  | 0.04670000  | -0.71747700 |
| H | -0.83295800 | 0.67283700  | -0.78708800 |
| C | -0.21920000 | -1.24576700 | 0.10176400  |
| O | 0.77282600  | -1.75748100 | 0.65783500  |
| O | -1.39866600 | -1.62954900 | 0.09982400  |
| O | 3.09849000  | -1.05507500 | -0.32202000 |
| H | 3.93804400  | -1.41680900 | -0.03496000 |
| H | 2.37196100  | -1.59086300 | 0.07796100  |
| H | 0.38640200  | -0.23928500 | -1.71867400 |
| C | 1.46164800  | 2.04434000  | -0.95698100 |
| C | 0.82045900  | 1.27687900  | 1.28641700  |
| H | 0.57932900  | 2.68220100  | -1.00430000 |
| H | 2.29458400  | 2.58971300  | -0.51561600 |
| H | 1.72996400  | 1.69844700  | -1.95363000 |
| H | 0.75270500  | 0.37370000  | 1.88917900  |
| H | 1.61934000  | 1.91901400  | 1.65488800  |
| H | -0.14118100 | 1.79029100  | 1.28144800  |
| O | -2.34018400 | 1.03240500  | 1.28258800  |
| H | -2.86700700 | 0.97891100  | 0.47144400  |
| H | -2.22119600 | 0.10190900  | 1.50630000  |
| O | -3.11874800 | -0.02390400 | -1.20217000 |
| H | -3.89374700 | -0.41150400 | -1.61157100 |
| H | -2.59309600 | -0.76282900 | -0.82132800 |

**Bet<sup>+</sup>(H<sub>2</sub>O)<sub>3</sub>**

|   |             |             |             |
|---|-------------|-------------|-------------|
| N | -0.60706600 | -0.97103600 | 0.07625500  |
| C | -0.04112600 | 0.28632300  | -0.51306100 |
| H | 0.47650300  | 0.02442500  | -1.43677200 |
| C | 0.95731200  | 1.00796100  | 0.37014700  |
| O | 1.37971900  | 0.62705600  | 1.42525000  |
| O | 1.28306800  | 2.15597300  | -0.21105100 |
| O | 2.87870900  | -0.46073700 | -0.97975500 |
| H | 3.41818400  | -0.33703300 | -1.76620700 |
| H | 3.50739800  | -0.55404300 | -0.25727900 |
| O | -3.05157600 | 1.56070500  | -0.46101400 |
| H | -3.86250400 | 1.51144300  | -0.97672500 |
| H | -3.05585000 | 2.44876200  | -0.09004200 |
| H | 1.94727900  | 2.60722600  | 0.33063400  |
| H | -0.88016100 | 0.94802000  | -0.73889300 |
| C | 0.45943800  | -1.99799000 | 0.32842400  |

|   |             |             |             |
|---|-------------|-------------|-------------|
| C | -1.57665300 | -1.51844300 | -0.92712500 |
| C | -1.35538300 | -0.68044400 | 1.34669300  |
| H | 1.10672800  | -1.64091900 | 1.12383500  |
| H | -0.03582400 | -2.92304700 | 0.62012600  |
| H | 1.03277600  | -2.13212700 | -0.58709100 |
| H | -1.03851500 | -1.74598400 | -1.84617800 |
| H | -2.01842200 | -2.42547000 | -0.51809600 |
| H | -2.34309300 | -0.76609800 | -1.10443500 |
| H | -2.13159000 | 0.04945000  | 1.11840800  |
| H | -1.79963400 | -1.61344000 | 1.69102200  |
| H | -0.65469700 | -0.30232600 | 2.08599300  |
| O | -1.35728635 | -0.39351878 | -3.04397466 |
| H | -0.39728635 | -0.39351878 | -3.04397466 |
| H | -1.67774094 | 0.51141706  | -3.04397466 |

**Bet<sup>+−</sup>(H<sub>2</sub>O)<sub>3</sub>**

|   |             |             |             |
|---|-------------|-------------|-------------|
| N | -0.60850400 | -0.04561200 | 0.27935500  |
| C | 0.82502000  | 0.06023500  | 0.76003700  |
| H | 0.88499200  | 0.97995200  | 1.33926800  |
| C | 1.81107100  | 0.10589600  | -0.44645200 |
| O | 2.23478200  | 1.23488900  | -0.74572100 |
| O | 2.02881800  | -0.98851600 | -1.00188700 |
| O | 0.90621100  | 3.17075400  | 0.55192400  |
| H | 1.33553300  | 4.02534400  | 0.61025300  |
| H | 1.51848500  | 2.58440300  | 0.04613100  |
| O | 1.45928200  | -3.09208700 | 0.60637100  |
| H | 1.76434700  | -2.42676800 | -0.05015300 |
| H | 2.19343700  | -3.69585100 | 0.72760600  |
| H | 1.00571600  | -0.81746300 | 1.38259600  |
| C | -0.88076400 | 0.94074500  | -0.81451400 |
| C | -1.50769300 | 0.25909900  | 1.42952900  |
| C | -0.90638400 | -1.42346200 | -0.22345800 |
| H | -0.25416200 | 0.68848200  | -1.66843800 |
| H | -1.93545500 | 0.85263400  | -1.07239500 |
| H | -0.63059800 | 1.93795900  | -0.45283400 |
| H | -1.31650300 | 1.28471100  | 1.74439600  |
| H | -2.53993300 | 0.13751800  | 1.10248700  |
| H | -1.27483700 | -0.43316700 | 2.23799900  |
| H | -0.71646400 | -2.13763400 | 0.57602800  |
| H | -1.94834700 | -1.43372800 | -0.54079800 |
| H | -0.23327700 | -1.63760400 | -1.05045100 |
| O | 3.81268921  | -0.01808787 | -2.24072441 |
| H | 3.41077586  | 0.85372957  | -2.24072441 |
| H | 3.25862982  | -0.80206377 | -2.24072441 |

**H<sub>3</sub>O<sup>+</sup>**

|   |             |             |            |
|---|-------------|-------------|------------|
| O | 0.00000000  | 0.00000000  | 0.00000000 |
| H | 0.00000000  | 0.97471500  | 0.00000000 |
| H | 0.84412800  | -0.48735800 | 0.00000000 |
| H | -0.84412800 | -0.48735800 | 0.00000000 |

**H<sub>2</sub>O**

|   |            |             |             |
|---|------------|-------------|-------------|
| O | 0.00000000 | 0.00000000  | 0.11657000  |
| H | 0.00000000 | 0.76160200  | -0.46627900 |
| H | 0.00000000 | -0.76160200 | -0.46627900 |
